# Supplementary material for: Inhibition of L. monocytogenes Biofilm Formation by the Amidase Domain of the Phage vB_LmoS_293 Endolysin
Source: MDPI journal article supplement (doi:10.3390/v11080722), 2019-08-06
Supplement: s1 [file s1]

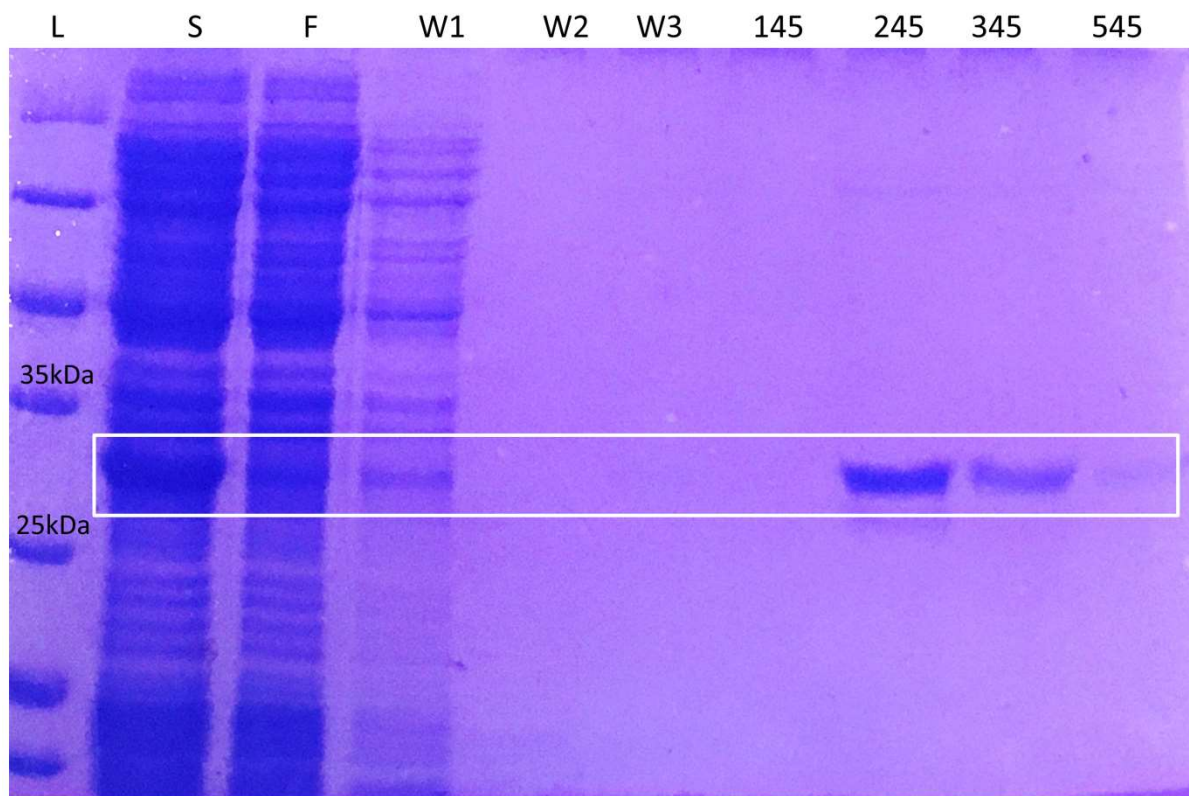

**Figure S2.** SDS-PAGE analysis of the 293-amidase purification showing the affinity chromatography fractions. The over-expressed protein band has been highlighted throughout the gel with a white rectangle and is clearly visible in the supernatant of the induced and lysed *E. coli* cells transformed with the pCri8A-293-amidase (S). After binding to the Ni-NTA resin, the band is less visible in the flow-through (F). L, ladder; S, supernatant of lysed cells; F, flow-through; W1 to W3, washing steps; 145 to 545, elution fractions with the values indicating the employed imidazole concentrations
