# Supplementary material for: Inhibition of L. monocytogenes Biofilm Formation by the Amidase Domain of the Phage vB_LmoS_293 Endolysin
Source: MDPI journal article supplement (doi:10.3390/v11080722), 2019-08-06
Supplement: s1 [file s1]

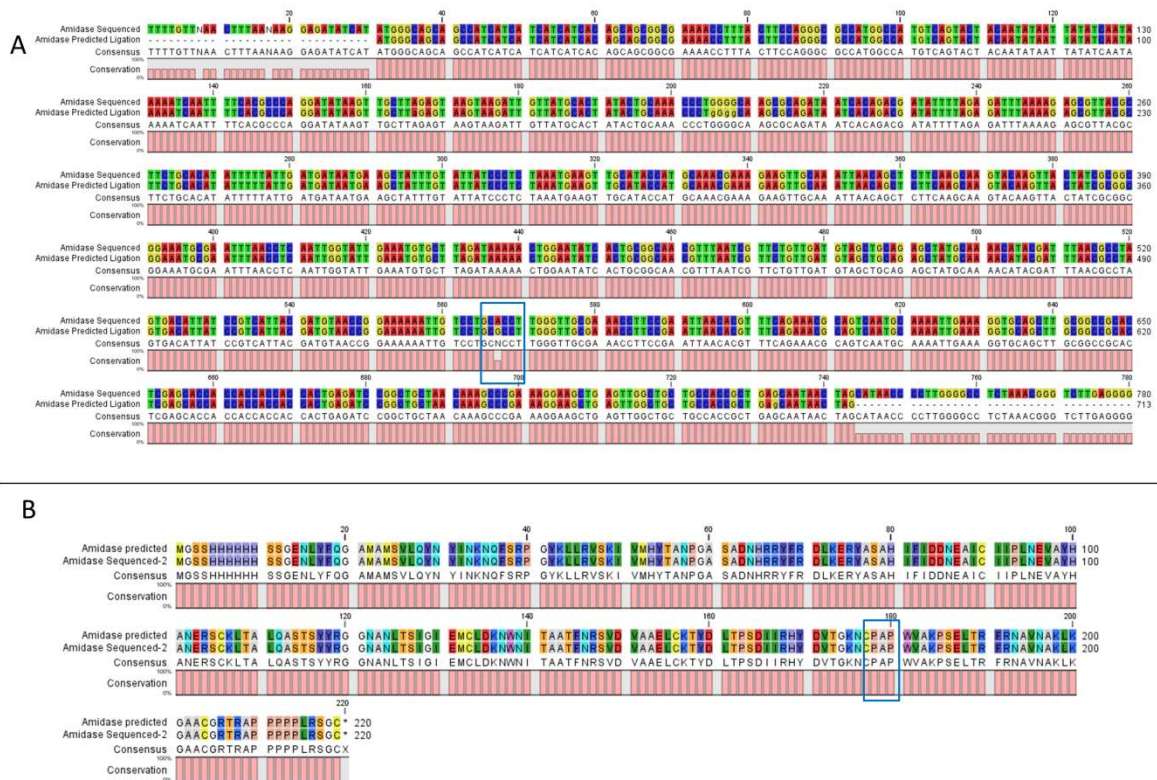

**Figure S1.** Local (A) DNA sequence alignment and (B) amino acid sequence alignment of predicted and cloned 293-amidase generated with CLC Main Workbench. A Single Nucleotide Polymorphism (SNP) is shown boxed in panel A showing a change from GCA to GCG in the cloned fragment of amidase-293.
